# Supplementary material for: Food-grade monoglyceride oil foams: the effect of tempering on foamability, foam stability and rheological properties
Source: Royal Society of Chemistry journal article supplement (doi:10.1039/c8fo00536b), 2018-01-01

## Supplementary information

Appendix 1. Melting profiles of MG-oil mixture measured during a stop-and-return experiment at 20°C (after cooling from 80°C to 5°C and subsequent heating to 20°C at a rate of 10°C/min). The isothermal crystallization was interrupted after 1 (solid line), 60 (dashed line), or 120 (dash dot line) minutes after which the sample was heated to 80°C at a rate of 20°C/min.

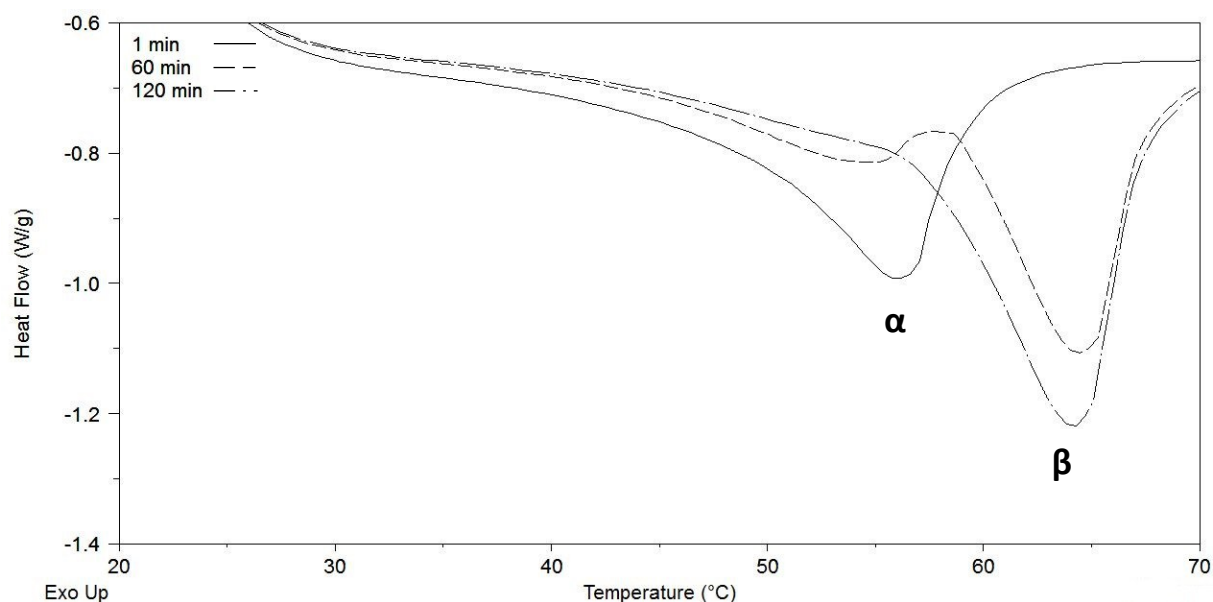

Appendix 2. Melting profiles of MG-oil mixture measured during a stop-and-return experiment at 20°C (after cooling from 80°C to 20°C at a rate of 10°C/min). The isothermal crystallization was interrupted after 1 (solid line), 180 (dashed line), or 300 (dash dot line) minutes after which the sample was heated to 80°C at a rate of 20°C/min.

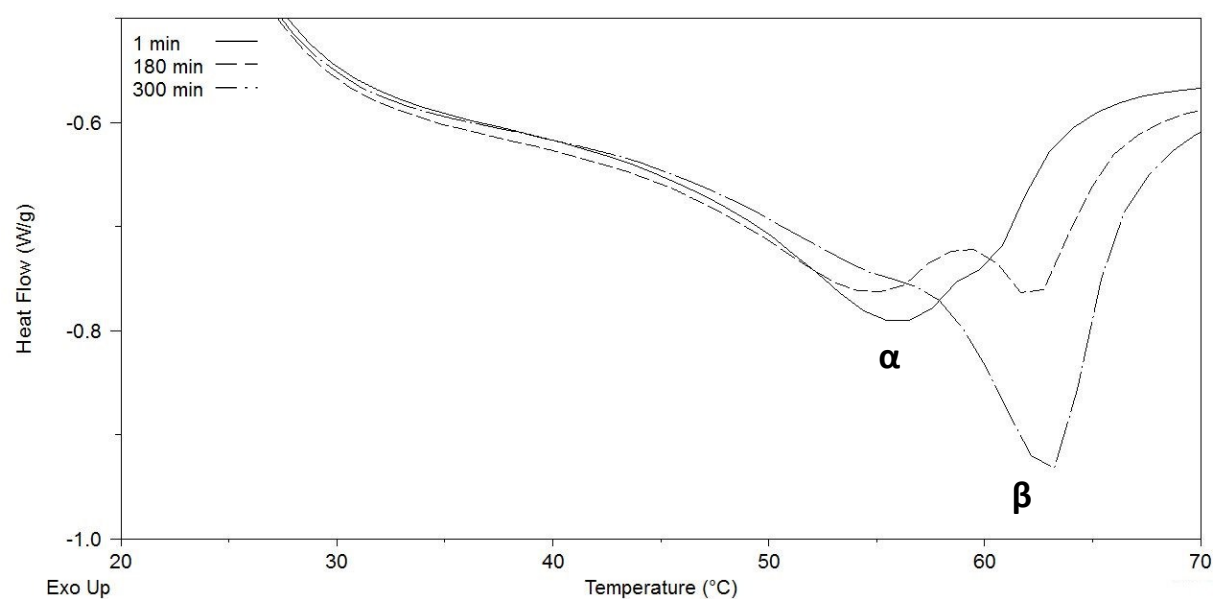

Appendix 3. Time-temperature profiles of the MG-oil mixtures (PAC = Partially alpha crystallized; AC = Alpha crystallized; ACS = Alpha crystallized and stored; SAC = Sub-alpha crystallized; MMACS = Melt-mediated alpha crystallized)

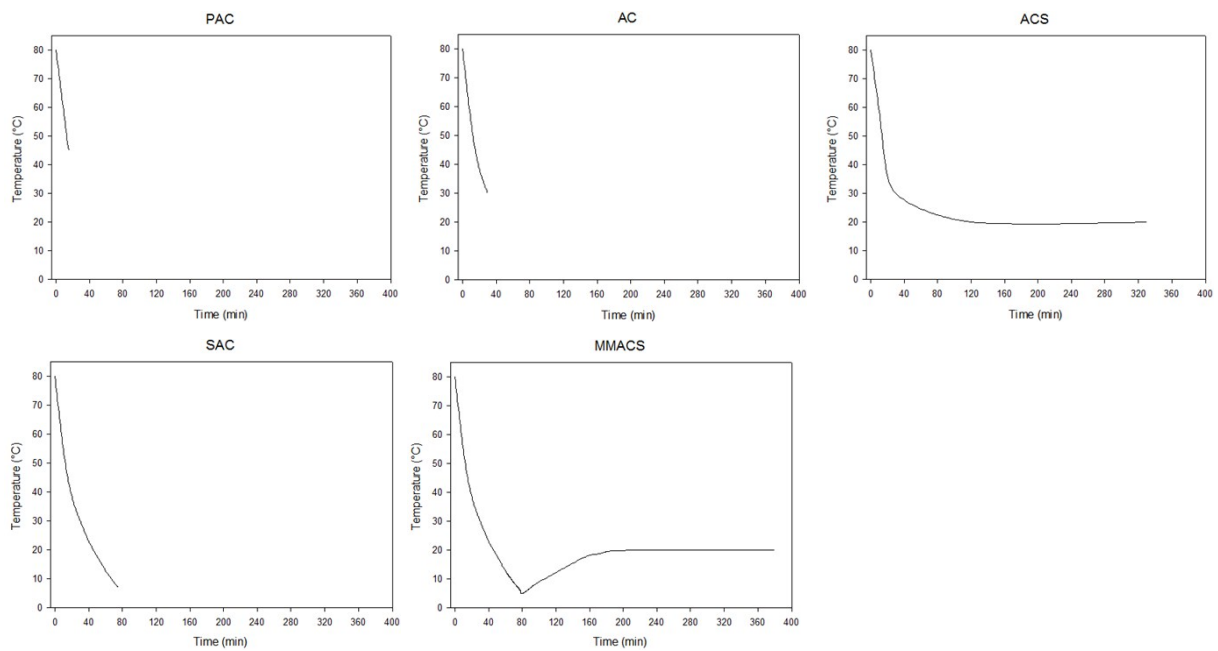

Appendix 4. Polarized light microscopy images of MG-oil foams (a) before and (b) after thixotropy measurements

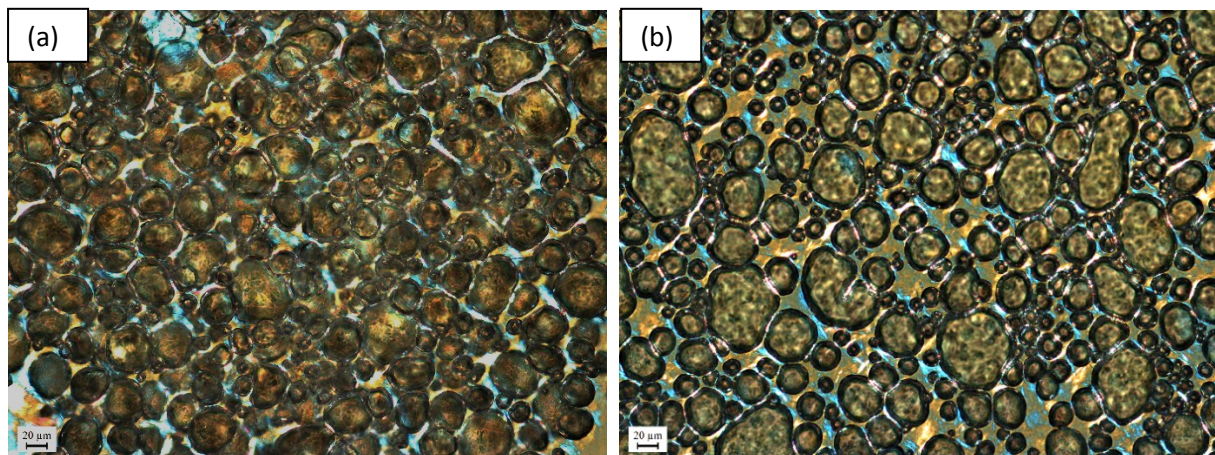

Appendix 5. Wide-angle X-ray diffractogram of MG-oil foams (determined within 1 hour after preparation). PAC = Partially alpha crystallized; AC = Alpha crystallized; ACS = Alpha crystallized and stored; MMACS = Melt-mediated alpha crystallized.

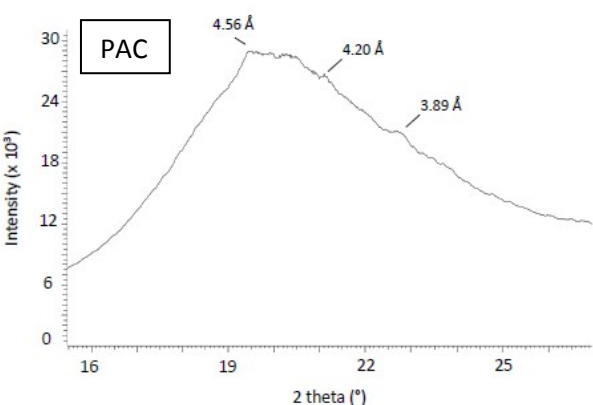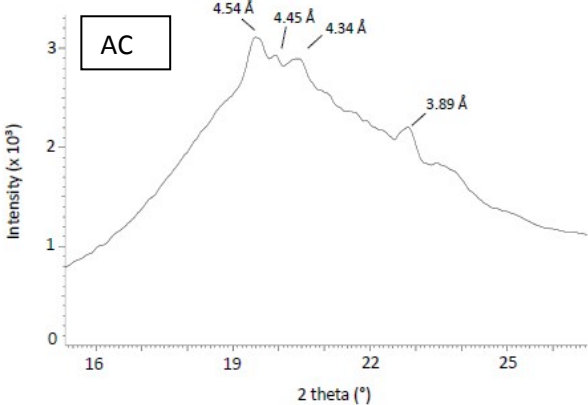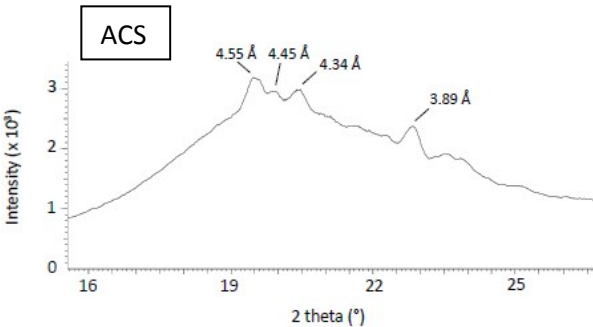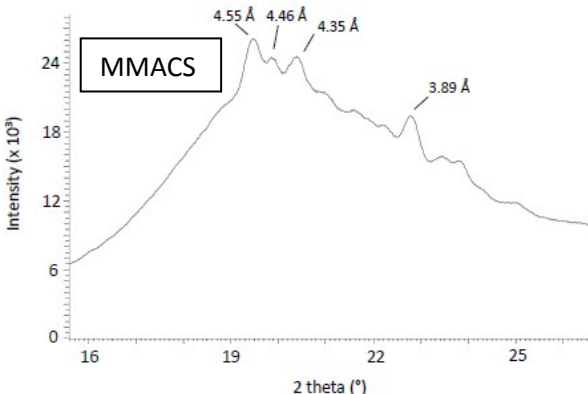

Supplement: c8fo00536b1.pdf [file c8fo00536b1.pdf]
